# Supplementary material
Source: PubMed Central journal article supplement (PMC6193533)
Supplement: NIHMS77059-supplement-Sup_Tables_2_and_3.pdf [file NIHMS77059-supplement-Sup_Tables_2_and_3.pdf]

**Supplementary Table 2. Ln fitness relative to *S. cerevisiae* of tRNA sequences from the six extant species.**

*S. cerevisiae* tRNA has a ln fitness of 0. One sample t-test performed to assess differences in fitness relative to *S. cerevisiae*. FDR considering all variants in the library (n=4,176 tests).

| <i>Species</i>        | <i>ln(fitness)</i> | <i>q-value</i> | <i>Nt distance to S. cerevisiae</i> |
|-----------------------|--------------------|----------------|-------------------------------------|
| <i>K. africana</i>    | 0.011              | 0.018          | 1                                   |
| <i>C. glabrata</i>    | -0.006             | 0.152          | 2                                   |
| <i>N. dairenensis</i> | 0.001              | 0.921          | 2                                   |
| <i>S. castellii</i>   | -0.023             | 0.202          | 3                                   |
| <i>K. naganishii</i>  | -0.024             | 0.043          | 4                                   |
| <i>T. blattae</i>     | -0.010             | 0.087          | 5                                   |

**Supplementary Table 3. Primers used in this study**

Illumina indexes of adapters written in lower case.

| <i>Primer name</i> | <i>Strand</i> | <i>Sequence (5' - 3')</i>                   | <i>Usage</i>                                                 |
|--------------------|---------------|---------------------------------------------|--------------------------------------------------------------|
| <b>JD007</b>       | <i>Fwd</i>    | CGCGGATCCCGAGGAGAACT<br>TCTAGTATATCTACATACC | Cloning genomic sequence of HSX1 into pRS413 to get pJD001   |
| <b>JD008</b>       | <i>Rev</i>    | GCTCTAGATTATATTTACCA<br>TCAACTCCGCGAC       | Cloning genomic sequence of HSX1 into pRS413 to get pJD001   |
| <b>JD027</b>       | <i>Fwd</i>    | TCTTAGAGTTCAACCAAGTT<br>G                   | Amplify synthesized oligonucleotide                          |
| <b>JD028</b>       | <i>Rev</i>    | ACGAAAAAAAAAAAAATAAT<br>CAA                 | Amplify synthesized oligonucleotide                          |
| <b>JD029</b>       | <i>Rev</i>    | CAACTTGGTTGAACTCTAAG<br>A                   | Linearizing by PCR pRS413 or pJD001                          |
| <b>JD030</b>       | <i>Fwd</i>    | TTGATTATTTTTTTTTTTTC<br>GT                  | Linearizing by PCR pRS413 or pJD001                          |
| <b>JD116</b>       |               | GCCTACATACCTCGCTCTGC                        | Plasmid library quantification by real-time quantitative PCR |
| <b>JD117</b>       |               | CAACCCGGTAAGACACGACT                        | Plasmid library quantification by real-time quantitative PCR |

|                                   |            |                                                                                                   |                                                                     |
|-----------------------------------|------------|---------------------------------------------------------------------------------------------------|---------------------------------------------------------------------|
| <b>JD126</b>                      | <i>Fwd</i> | <i>ACACTCTTTCCCTACACGAC<br/>GCTCTTCCGATCTTCTTAGA<br/>GTTCAACCAAGTTG</i>                           | <i>Amplify tRNA library<br/>adding part of Illumina<br/>adapter</i> |
| <b>JD127</b>                      | <i>Rev</i> | <i>GTGACTGGAGTTCAGACGT<br/>GTGCTCTTCCGATCTACGAA<br/>AAAAAAAAATAATCAA</i>                          | <i>Amplify tRNA library<br/>adding part of Illumina<br/>adapter</i> |
| <b>TS-HT-D7x-51-<br/>r</b>        | <i>Rev</i> | <i>CAA GCA GAA GAC GGC ATA<br/>CGA GAT gacggatt GTG<br/>ACT GGA GTT CAG ACG TGT<br/>GCT CTT C</i> | <i>Add index to Illumina<br/>adapter</i>                            |
| <b>TS-HT-D7x-55-<br/>r</b>        | <i>Rev</i> | <i>CAA GCA GAA GAC GGC ATA<br/>CGA GAT gcaactaa GTG<br/>ACT GGA GTT CAG ACG TGT<br/>GCT CTT C</i> | <i>Add index to Illumina<br/>adapter</i>                            |
| <b>TS-HT-D7x-57-<br/>r</b>        | <i>Rev</i> | <i>CAA GCA GAA GAC GGC ATA<br/>CGA GAT gcatcgac GTG<br/>ACT GGA GTT CAG ACG TGT<br/>GCT CTT C</i> | <i>Add index to Illumina<br/>adapter</i>                            |
| <b>TS-HT-D7x-61-<br/>r</b>        | <i>Rev</i> | <i>CAA GCA GAA GAC GGC ATA<br/>CGA GAT ggcgttgc GTG ACT<br/>GGA GTT CAG ACG TGT GCT<br/>CTT C</i> | <i>Add index to Illumina<br/>adapter</i>                            |
| <b>TS-HT-D7x-63-<br/>r</b>        | <i>Rev</i> | <i>CAA GCA GAA GAC GGC ATA<br/>CGA GAT ggtagttg GTG ACT<br/>GGA GTT CAG ACG TGT GCT<br/>CTT C</i> | <i>Add index to Illumina<br/>adapter</i>                            |
| <b>TS-HT-D7x-65-<br/>r</b>        | <i>Rev</i> | <i>CAA GCA GAA GAC GGC ATA<br/>CGA GAT gtaattat GTG ACT<br/>GGA GTT CAG ACG TGT GCT<br/>CTT C</i> | <i>Add index to Illumina<br/>adapter</i>                            |
| <b>TS-HT-D7x-70-<br/>r</b>        | <i>Rev</i> | <i>CAA GCA GAA GAC GGC ATA<br/>CGA GAT gttcaggc GTG ACT<br/>GGA GTT CAG ACG TGT GCT<br/>CTT C</i> | <i>Add index to Illumina<br/>adapter</i>                            |
| <b>TS-HT-D7x-73-<br/>r</b>        | <i>Rev</i> | <i>CAA GCA GAA GAC GGC ATA<br/>CGA GAT taagcctg GTG ACT<br/>GGA GTT CAG ACG TGT GCT<br/>CTT C</i> | <i>Add index to Illumina<br/>adapter</i>                            |
| <b>Illumina<br/>adapter 1.0 f</b> | <i>Fwd</i> | <i>AATGATACGGCGACCACCGA<br/>GATCTACACTCTTCCCTAC<br/>ACGACGCTCTCCGATCT</i>                         | <i>Add rest of adapter to<br/>Illumina forward<br/>universal</i>    |
